# Supplementary material for: Hierarchical porous MnCo2O4 yolk–shell microspheres from MOFs as secondary nanomaterials for high power lithium ion batteries
Source: Royal Society of Chemistry journal article supplement (doi:10.1039/c9dt00613c), 2019-01-01
Supplement: c9dt00613c1.pdf [file c9dt00613c1.pdf]

## Supporting Information

### **Hierarchical porous MnCo<sub>2</sub>O<sub>4</sub> yolk-shell microspheres from MOFs as secondary nanomaterials for high power lithium ion batteries**

*Hongxun Yang<sup>a, b, \*</sup>, Yue Xie<sup>a, c</sup>, Miaomiao Zhu<sup>a</sup>, Yongmin Liu<sup>a</sup>, Zhenkang Wang<sup>a</sup>, Minghang Xu<sup>a</sup>, and Shengling Lin<sup>a</sup>*

*<sup>a</sup>School of Environmental & Chemical Engineering, Jiangsu University of Science and Technology, Zhenjiang 212003, Jiangsu, China, <sup>b</sup>Marine Equipment and Technology Institute, Jiangsu University of Science and Technology, Zhenjiang 212003, Jiangsu, China, <sup>c</sup>State Key Laboratory of Structural Chemistry, Fujian Institute of Research on the Structure of Matter, Chinese Academy of Sciences, Fujian, Fuzhou 350002, China*

\*Corresponding author: E-mail address: [yhongxun@126.com](mailto:yhongxun@126.com) (Hongxun Yang)

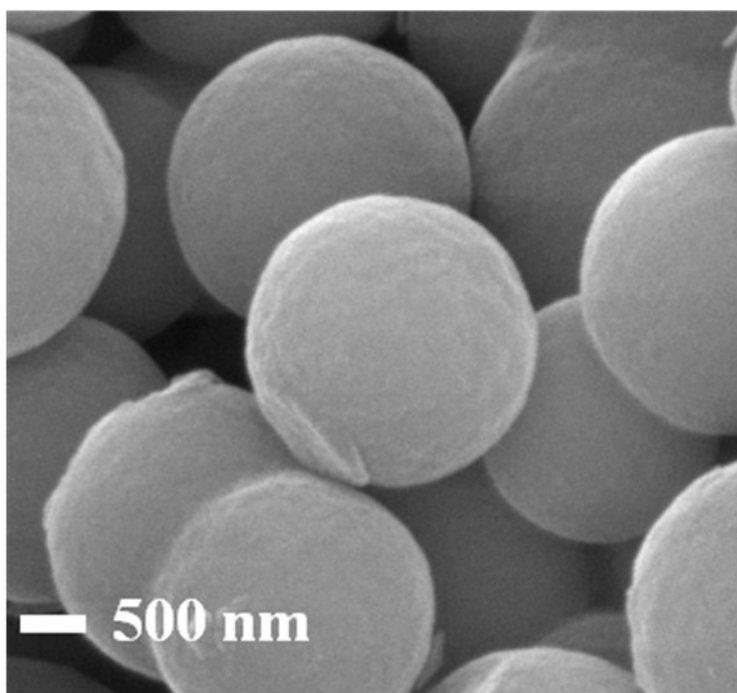

Fig. S1 SEM images of MnCo-MOF precursor.

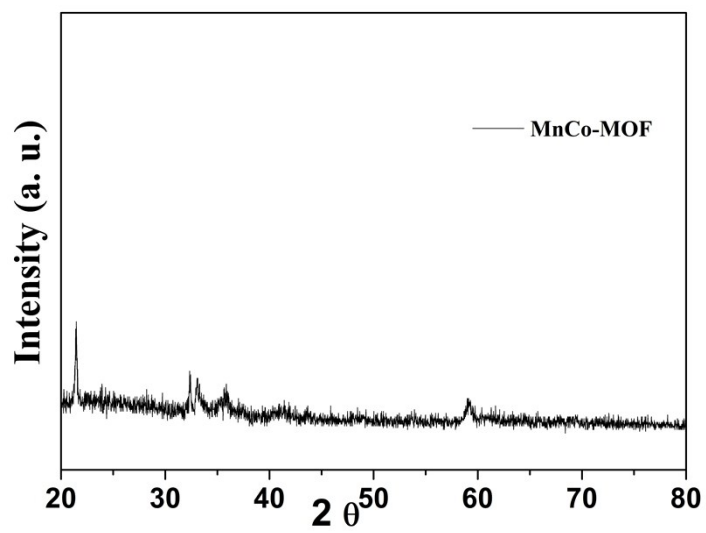

Fig. S2 XRD patterns of MnCo-MOF precursor.

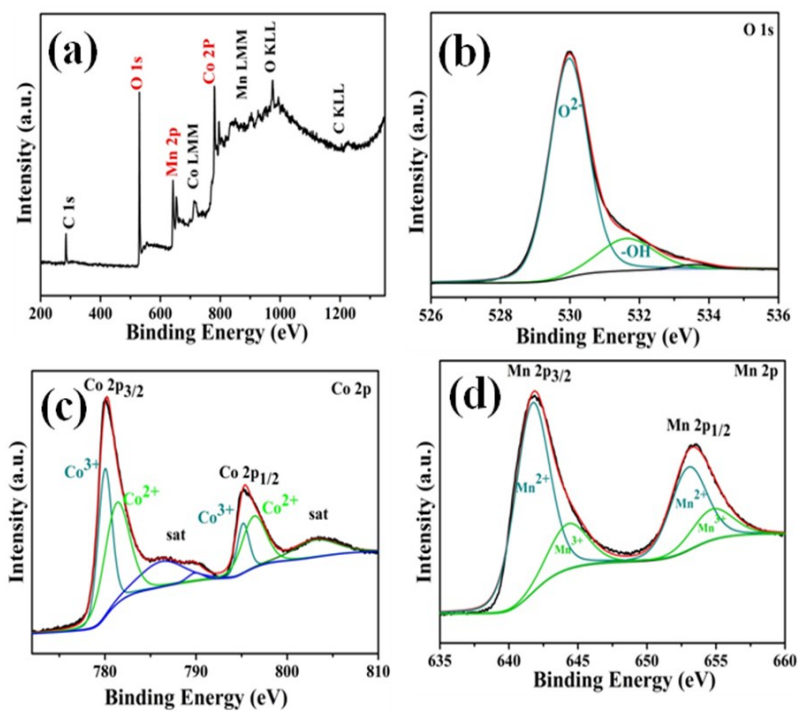

Fig. S3. (a) XPS survey scan of MnCo<sub>2</sub>O<sub>4</sub> microspheres. (b) XPS of O1s. (c) XPS of the Co2p. (d) XPS of Mn2p.

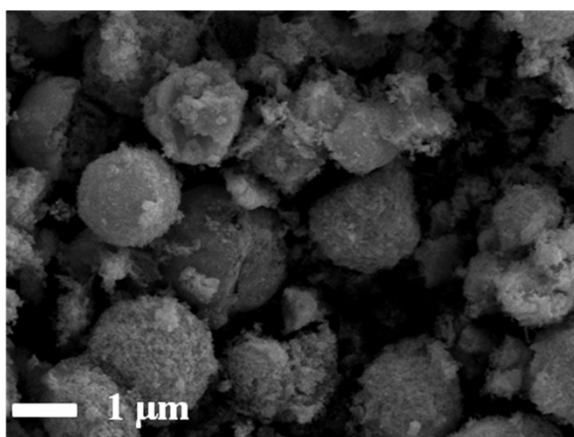

Fig. S4 SEM images of porous MnCo<sub>2</sub>O<sub>4</sub> yolk-shell microspheres at low magnification.

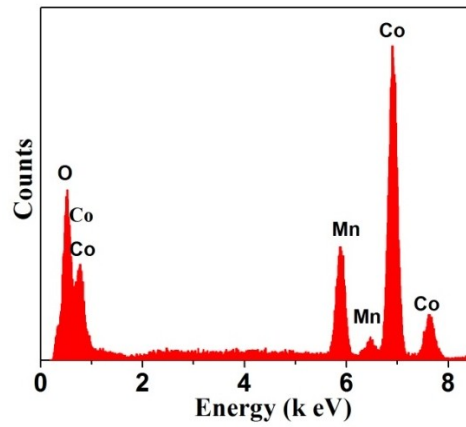

Figure S5. EDS spectrum of the hierarchical porous MnCo<sub>2</sub>O<sub>4</sub> yolk-shell microspheres.

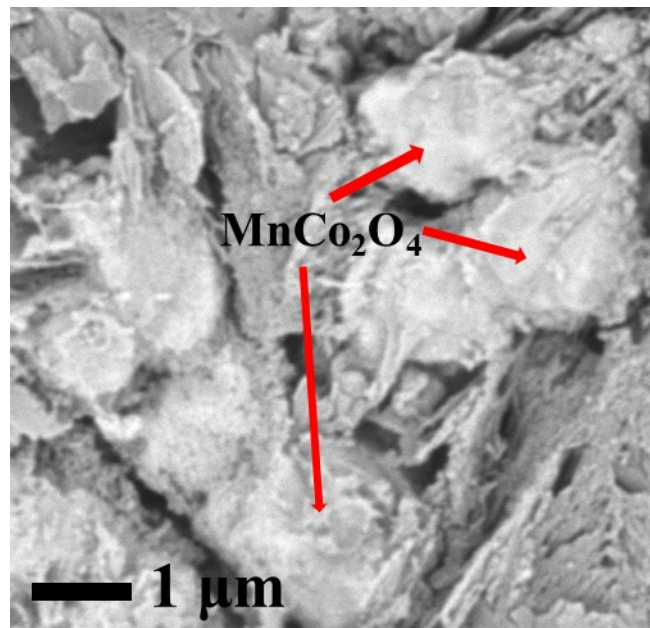

Figure S6. SEM images of the hierarchical porous MnCo<sub>2</sub>O<sub>4</sub> yolk-shell microspheres after 70<sup>th</sup> cycle at 0.1 C.

Table S1. Comparison of the cycling performance of MnCo<sub>2</sub>O<sub>4</sub> between our work and previous reports.

| Materials                                                  | Capacity (mAhg <sup>-1</sup> ) | Current density (mA g <sup>-1</sup> ) | Cycle number | Refs      |
|------------------------------------------------------------|--------------------------------|---------------------------------------|--------------|-----------|
| MnCo <sub>2</sub> O <sub>4</sub> yolk-shell microspheres   | 998.4                          | 100                                   | 50           | This work |
|                                                            | 910.1                          | 100                                   | 70           | This work |
|                                                            | 691.3                          | 1000                                  | 500          | This work |
| MnCo <sub>2</sub> O <sub>4</sub> nanowires                 | 800                            | 200                                   | 50           | 14        |
| MnCo <sub>2</sub> O <sub>4</sub> hollow nanofibers         | 997                            | 100                                   | 50           | 15        |
| CoMn <sub>2</sub> O <sub>4</sub> hollow microcubes         | 624                            | 200                                   | 50           | 18        |
| MnCo <sub>2</sub> O <sub>4</sub> power 1-2 um              | 863                            | 60                                    | 45           | 20        |
| MnCo <sub>2</sub> O <sub>4</sub> microspheres              | 722                            | 200                                   | 25           | 21        |
| MnCo <sub>2</sub> O <sub>4</sub> submicrospheres           | 670                            | 400                                   | 100          | 23        |
| MnCo <sub>2</sub> O <sub>4</sub> /graphene                 | 584.3                          | 2000                                  | 250          | 24        |
| Porous MnCo <sub>2</sub> O <sub>4</sub>                    | 690.1                          | 500                                   | 100          | 25        |
| MnCo <sub>2</sub> O <sub>4</sub> nanoparticles             | 431.1                          | 500                                   | 100          | 25        |
| Porous MnCo <sub>2</sub> O <sub>4</sub>                    | 226.2                          | 1000                                  | 100          | 25        |
| MnCo <sub>2</sub> O <sub>4</sub> microellipses             | 616.7                          | 400                                   | 50           | 26        |
| hierarchical MnCo <sub>2</sub> O <sub>4</sub> nanosheets   | 460                            | 800                                   | 30           | 28        |
| MnCo <sub>2</sub> O <sub>4</sub> quasi-hollow microspheres | 610                            | 400                                   | 100          | 29        |
|                                                            | 755                            | 200                                   | 25           | 29        |
| MnCo <sub>2</sub> O <sub>4.5</sub>                         | 413                            | 300                                   | 100          | 45        |
| MnCo <sub>2</sub> O <sub>4</sub> microspheres              | 894                            | 100                                   | 65           | 47        |
| CoMn <sub>2</sub> O <sub>4</sub> powders                   | 515                            | 69                                    | 50           | 47        |

[14] S. G. Mohamed, T. F. Hung, C. J. Chen, C. K. Chen, S. F. Hu and R. S. Liu, *RSC Adv.*, 2014, **4**, 17230-17235.

[15] S. M. Hwang, S. Y. Kim, J. G. Kim, K. J. Kim, J. W. Lee, M. S. Park, Y. J. Kim, M. Shahabuddin, Y. Yamauchif and J. H. Kim, *Nanoscale*, 2015, **7**, 8351-8355.

[18] L. Zhou, D. Y. Zhao, X. W. Lou, *Adv. Matetr.* 2012, **6**, 745-748.

- [20] G. D. Li, L. Xu, Y. Zhai and Y. P. Hou, *J. Mater. Chem. A*, 2015, **3**, 14298-14306.
- [21] C.C. Fu, G.S. Li, D. Luo, X.S. Huang, J. Zheng, L.P. Li, One-Step Calcination-Free Synthesis of Multicomponent Spinel Assembled Microspheres for High-Performance Anodes of Li-Ion Batteries: A Case Study of  $\text{MnCo}_2\text{O}_4$ , *ACS Appl. Mater. Interfaces*, 2014, **6**, 2439.
- [23] J. F. Li, J. Z. Wang, X. Liang, Z. J. Zhang, H. K. Liu and Y. T. Qian, *ACS Appl. Mater. Interfaces*, 2014, **6**, 24-30.
- [24] C. Chen, B. R. Liu, Q. Ru, S. M. Ma, B. N. An, X. H. Hou and S. J. Hu, *J. Power Sources* 2016, **326**, 252-263.
- [25] D. S. Baji, H. S. Jadhav, S. V. Nair and A. K. Rai, *J. Solid State Chem.* 2018, **262**, 191-198.
- [26] X. Y. Wu, S. M. Li, B. Wang, J. H. Liu and M. Yu, *New J. Chem.*, 2015, **39**, 8416-8423.
- [28] F. M. Courtel, H. Duncan, Y. Abu-Lebdeh, I. J. Davidson, *J. Mater. Chem.* 2012, **21**, 10206-10218.
- [28] L. Yu, L. Zhang, H. B. Wu, G. Q. Zhang and X. W. Lou, *Energy Environ. Sci.*, 2013, **6**, 2664-2671.
- [29] J. F. Li, S. L. Xiong, X. W. Li and Y. T. Qian, *Nanoscale*, 2013, **5**, 2045-2054.
- [45] X. D. Hu, S. M. Zhang, X. Li, X. H. Sun, S. Cai, H. M. Ji, F. Hou, C. M. Zheng and W. B. Hu, *J. Mater. Sci.*, 2017, **52**, 5268-5282.
- [47] L. Hu, H. Zhong, X. R. Zheng, Y. M. Huang, P. Zhang and Q. W. Chen, *Sci. Reports*, 2012, **986**, 1-8.
